# Supplementary material for: Coffee Pulp, a By-Product of Coffee Production, Modulates Gut Microbiota and Improves Metabolic Syndrome in High-Carbohydrate, High-Fat Diet-Fed Rats
Source: MDPI journal article supplement (doi:10.3390/pathogens10111369), 2021-10-22
Supplement: s1 [file s1]

## Article

# Coffee Pulp, a By-Product of Coffee Production, Modulates Gut Microbiota and Improves Metabolic Syndrome in High-Carbohydrate, High-Fat Diet-Fed Rats

Nikhil S. Bhandarkar <sup>1,†</sup>, Peter Mouatt <sup>2</sup>, Marwan E. Majzoub <sup>3</sup>, Torsten Thomas <sup>3</sup>, Lindsay Brown <sup>1,‡</sup>, and Sunil K. Panchal <sup>1,\*</sup>

<sup>1</sup> Functional Foods Research Group, University of Southern Queensland, Toowoomba, QLD 4350, Australia; bhandark@post.bgu.ac.il (N.S.B.); lindsay.brown@griffith.edu.au (L.B.)

<sup>2</sup> Southern Cross Plant Science, Southern Cross University, Lismore, NSW 2480, Australia; Peter.Mouatt@scu.edu.au

<sup>3</sup> Centre for Marine Science and Innovation & School of Biological, Earth and Environmental Sciences, University of New South Wales, Sydney, NSW 2052, Australia; m.majzoub@unsw.edu.au (M.E.M.); t.thomas@unsw.edu.au (T.T.)

\* Correspondence: S.Panchal@westernsydney.edu.au; Tel.: +61-2-4570-1932; Present address: School of Science, Western Sydney University, Richmond, NSW 2753, Australia

† Present address: Department of Clinical Biochemistry and Pharmacology, Ben-Gurion University of the Negev, Beer-Sheva, Israel

‡ Present address: School of Pharmacy and Medical Science, Griffith University, Southport, QLD 4222, Australia

**Citation:** Bhandarkar, N.S.; Mouatt, P.; Majzoub, M.E.; Thomas, T.; Brown, L.; Panchal, S.K. Coffee Pulp, a By-Product of Coffee Production, Modulates Gut Microbiota and Improves Metabolic Syndrome in High-Carbohydrate, High-Fat Diet-Fed Rats. *Pathogens* **2021**, *10*, x.

<https://doi.org/10.3390/xxxxx>

Academic Editor: Ana Elena Pérez

Cobas

Received: 2 September 2021

Accepted: 18 October 2021

Published: date

## Supplementary Information

**Publisher's Note:** MDPI stays neutral with regard to jurisdictional claims in published maps and institutional affiliations.

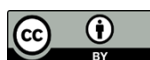

**Copyright:** © 2021 by the authors. Submitted for possible open access publication under the terms and conditions of the Creative Commons Attribution (CC BY) license (<https://creativecommons.org/licenses/by/4.0/>).

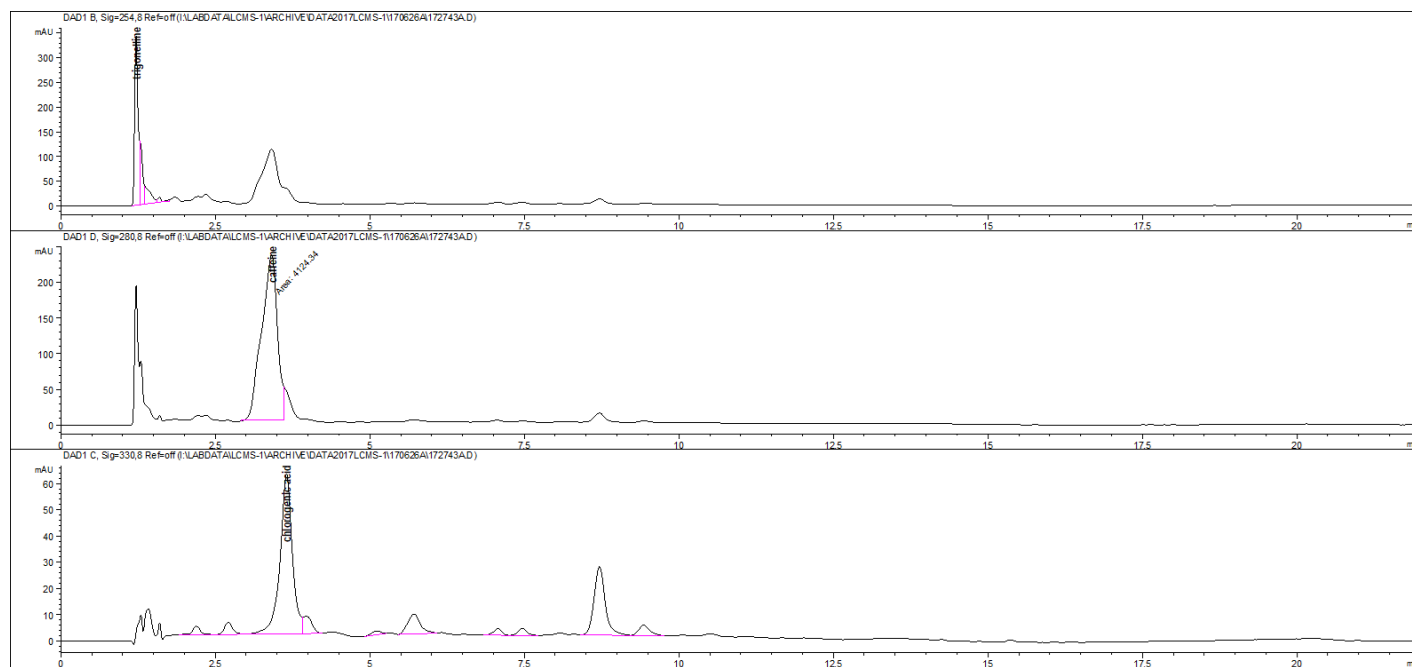

**Figure S1.** HPLC-UV chromatogram top to bottom – 254nm for trigonelline, 280nm for caffeine, 330nm for chlorogenic acid and phenolic acids.

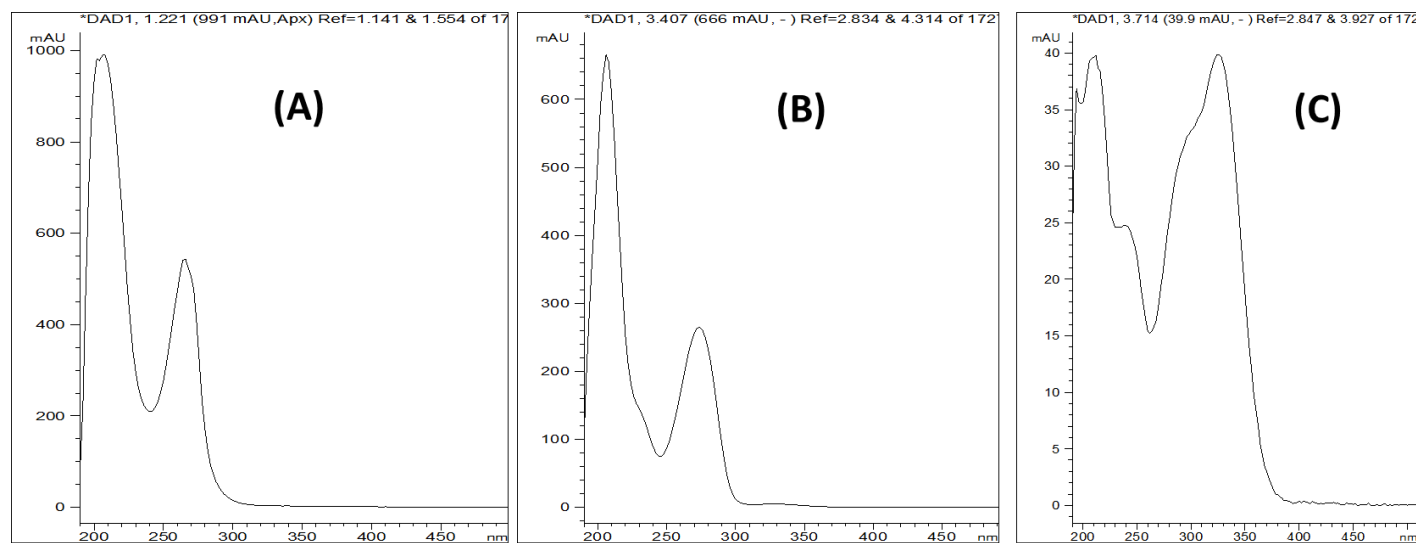

**Figure S2.** (A) Trigonelline UV-Vis spectra  $\lambda$  max ~266nm, (B) Caffeine UV-Vis spectra  $\lambda$  max ~274nm, (C) Chlorogenic acid UV-Vis spectra  $\lambda$  max ~325nm.

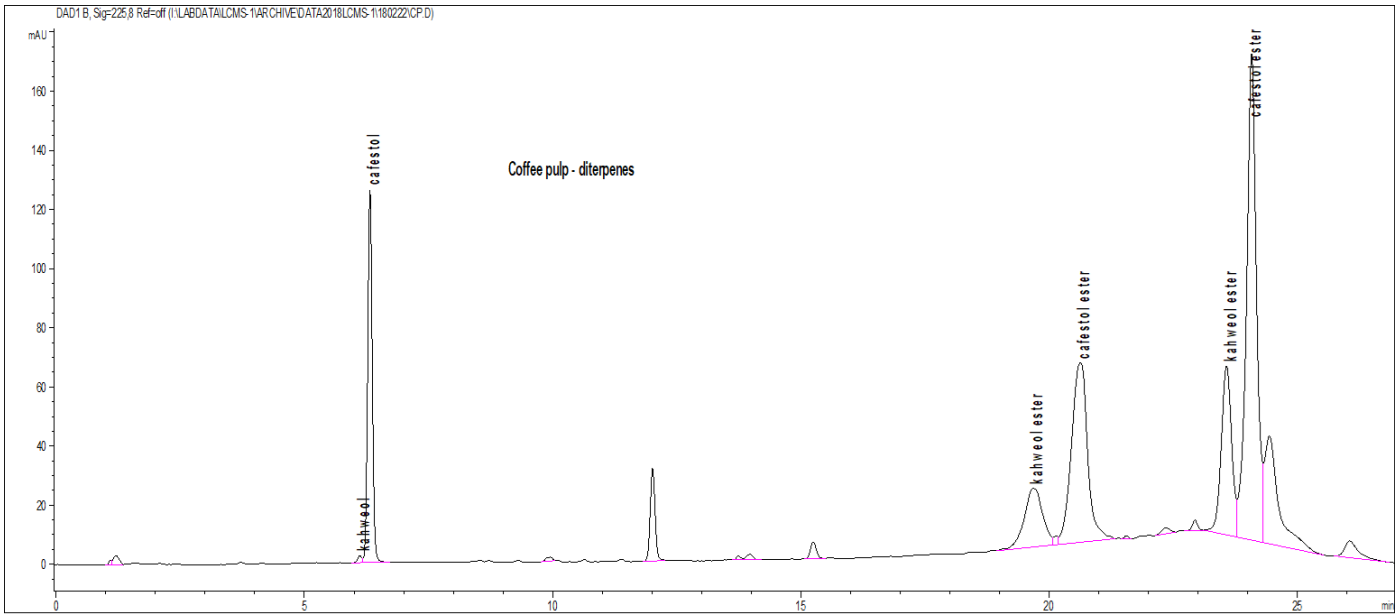

**Figure S3.** HPLC-UV chromatogram 225nm for diterpenes in coffee pulp [74,75].

•

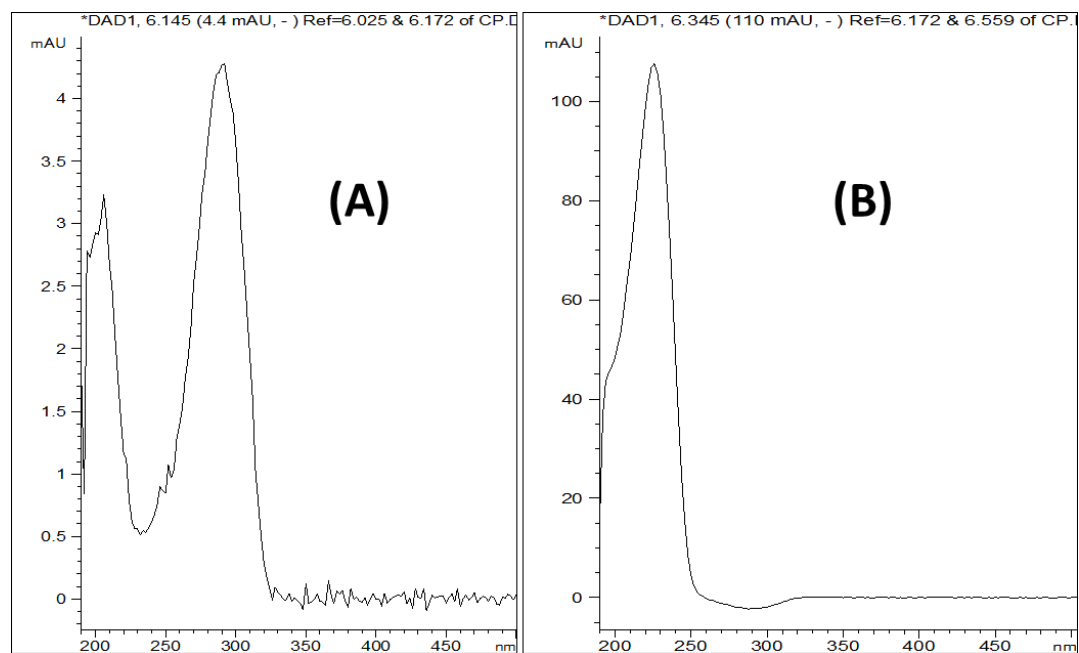

**Figure S4.** (A) Kahweol UV-Vis  $\lambda$  max ~290 nm, (B) Cafestol UV-Vis spectra  $\lambda$  max ~226 nm.

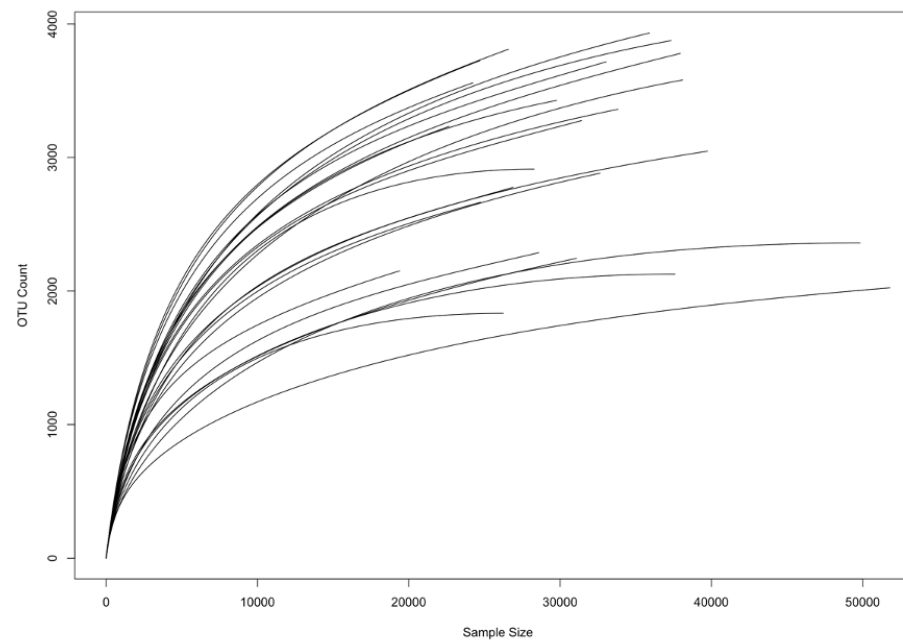

**Figure S5.** Rarefaction curves. 16S rRNA gene-based analysis was used to assess the bacterial communities from a total of 24 rat faecal pellets (6 rats per group). After quality filtering, there were a total of 772,429 sequences and these were clustered into 6,427 zOTUs. The calculated rarefaction curves based on rarefied and unrarefied data as well as Good's coverage of  $85.8 \pm 25.5\%$  indicating that the majority of the bacterial community was recovered by the surveying effort.

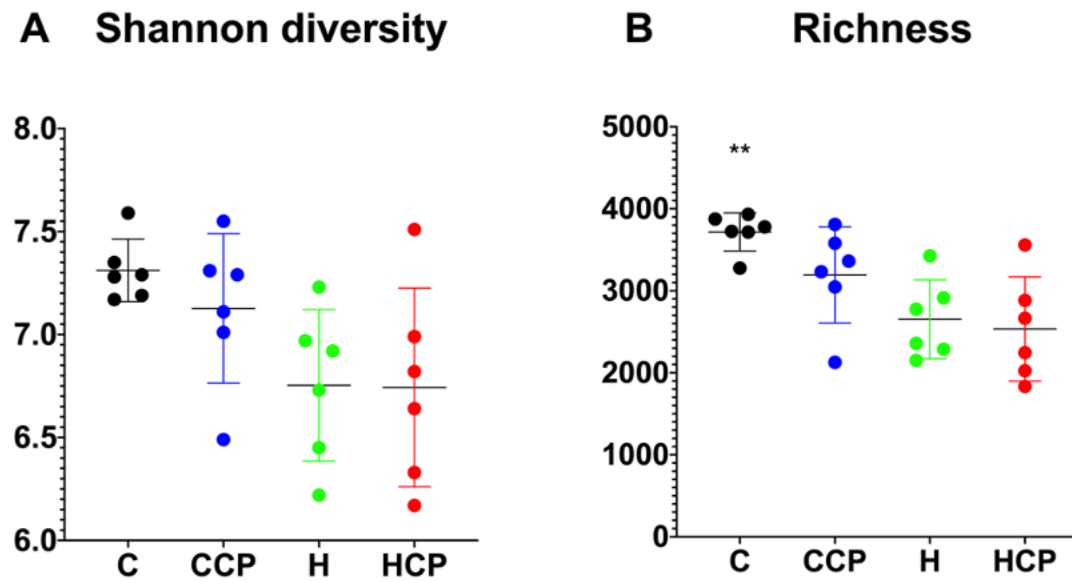

**Figure S6.** Shannon diversity (A) and richness (B) of faecal samples. \*\* vs CCP, H and HCP,  $p < 0.05$ .

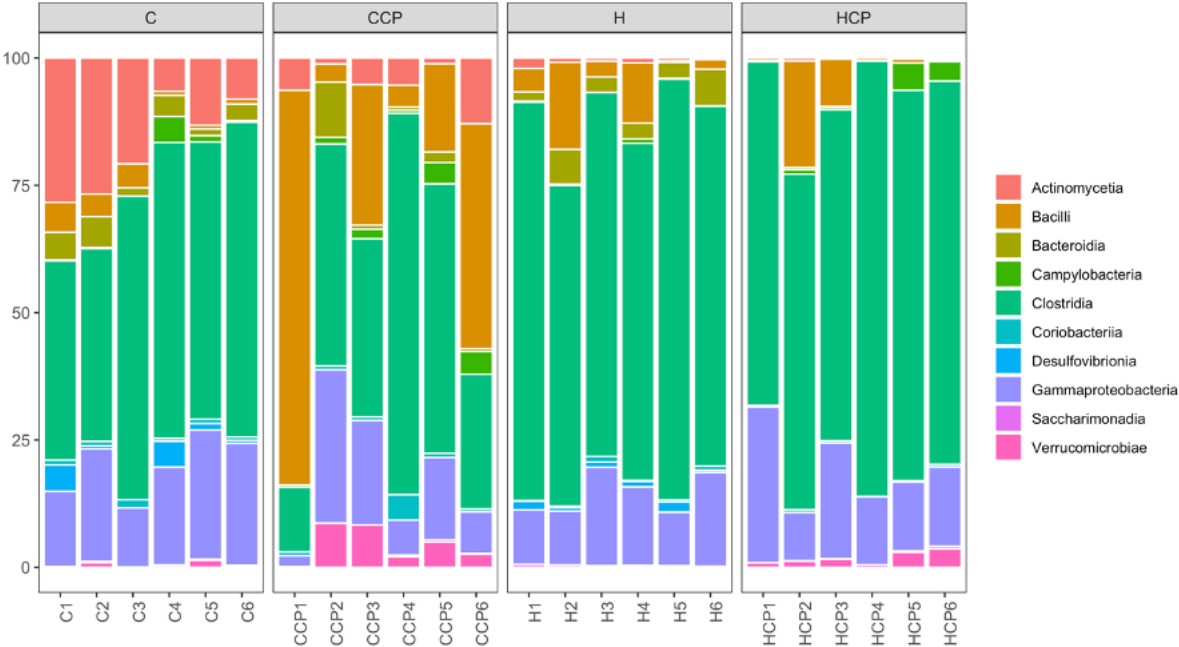

**Figure S7.** Taxonomic profiles of bacterial communities shown at the class level of all faecal samples.



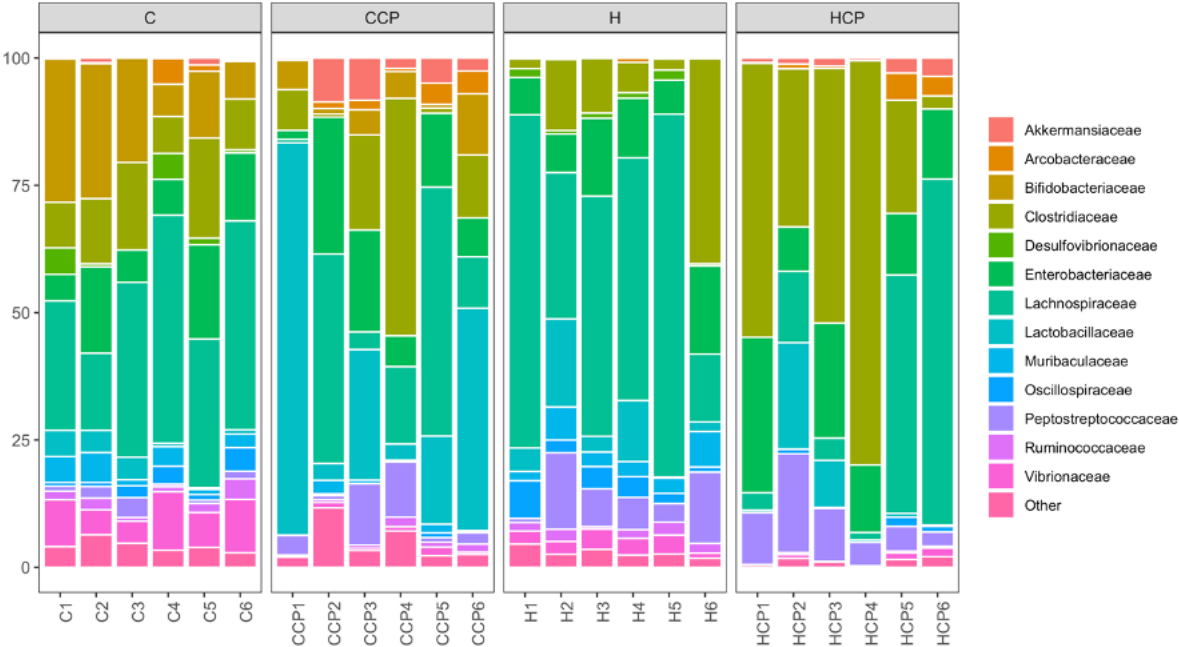

**Figure S8.** Taxonomic profiles of bacterial communities shown at the family level of all faecal samples.

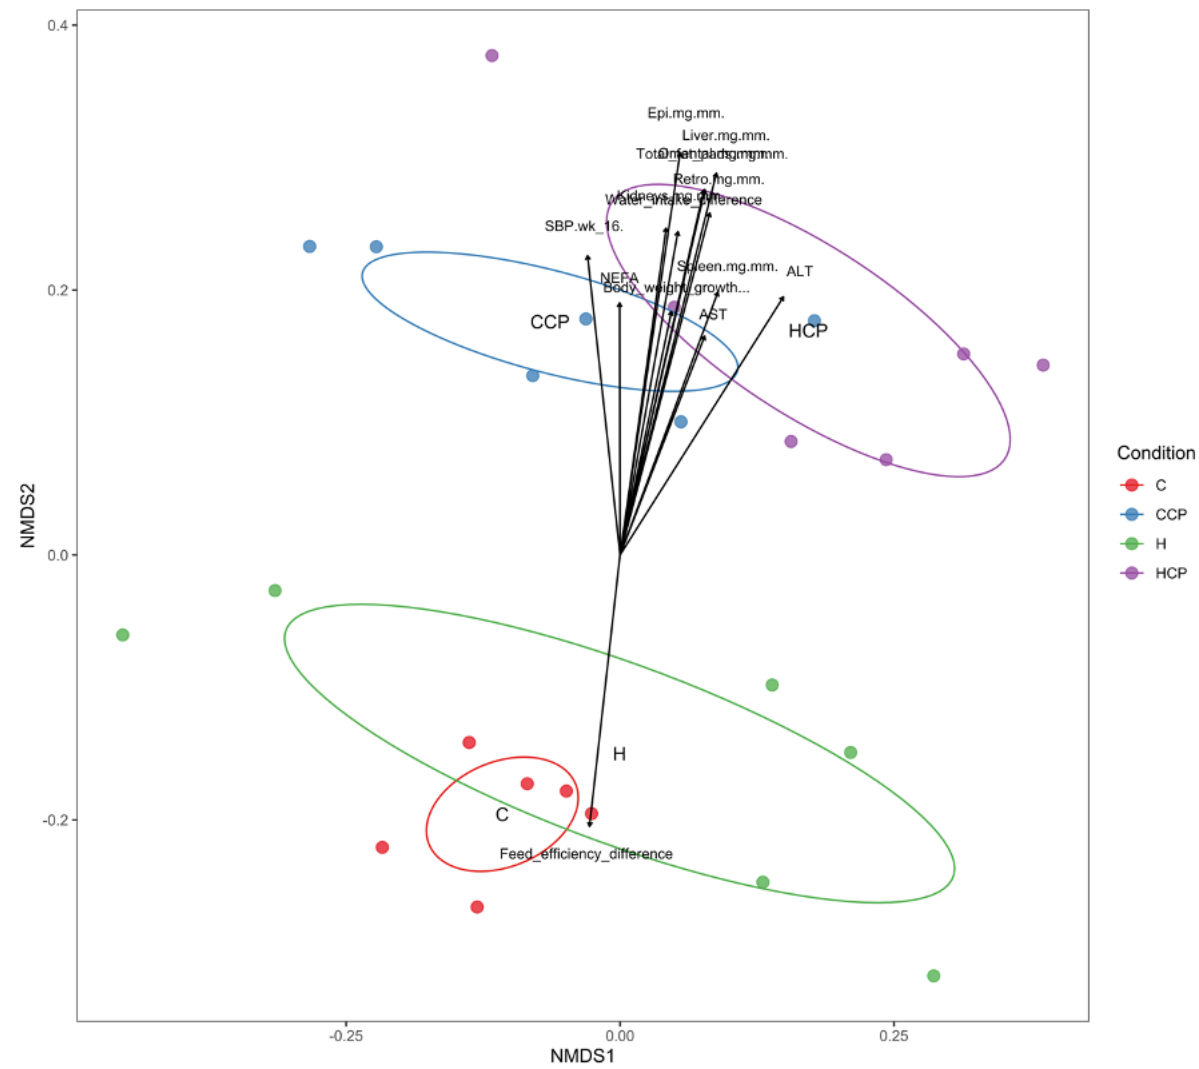

**Figure S9.** nMDS plot of physiological data from 23 physiological parameters measured from different feeding regimes.

**Table S1.** PERMANOVAs based on Bray-Curtis (BC) similarity measure for square-root transformed abundances of all rat faecal samples.

| Source           | df | Sums of Sqs    | MeanSqs | Pseudo-F | <i>p</i> |
|------------------|----|----------------|---------|----------|----------|
| Diet             | 1  | 1.002          | 1.00197 | 5.54027  | 0.0001   |
| Treatment        | 2  | 0.9923         | 0.9923  | 5.3506   | 0.0001   |
| Diet × treatment | 2  | 0.4138         | 0.41377 | 2.2311   | 0.017    |
| Res              | 20 | 3.7091         | 0.18546 |          |          |
| Total            | 23 | 6.1172         |         |          |          |
| PAIR-WISE TESTS  |    |                |         |          |          |
| Groups           |    | <i>F.model</i> |         | <i>p</i> |          |
| C, CCP           |    | 3.999212       |         | 0.024    |          |
| C, H             |    | 4.762622       |         | 0.012    |          |
| C, HCP           |    | 6.094594       |         | 0.018    |          |
| CCP, H           |    | 4.777236       |         | 0.03     |          |
| CCP, HCP         |    | 3.147970       |         | 0.066    |          |
| H, HCP           |    | 3.577782       |         | 0.108    |          |

*P*-values were calculated using 9,999 permutations under a residual model ( $p < 0.05$ ). C, corn starch diet-fed rats; CCP, corn starch diet-fed rats supplemented with coffee pulp; H, high-carbohydrate, high-fat diet-fed rats; HCP, high-carbohydrate, high-fat diet-fed rats supplemented with coffee pulp.

Table S2. Differential zOTU abundance between C and H rats.

| zOTU_ID  | H%   | HCP% | Phylum           | Class          | Family          | Genus       | Species                 |
|----------|------|------|------------------|----------------|-----------------|-------------|-------------------------|
| Zotu5206 | 0.00 | 0.08 | Actinobacteriota | Coriobacteriia | Eggerthellaceae | CAG-1427    | CAG-1427 sp000435675    |
| Zotu5890 | 0.03 | 0.00 | Bacteroidota     | Bacteroidia    | Muribaculaceae  | Muribaculum | Muribaculum sp001701195 |
| Zotu5281 | 0.08 | 0.00 | Bacteroidota     | Bacteroidia    | Muribaculaceae  | Muribaculum | Muribaculum sp001701195 |
| Zotu4405 | 0.05 | 0.00 | Bacteroidota     | Bacteroidia    | Muribaculaceae  | Muribaculum | Muribaculum sp001701195 |
| Zotu5561 | 0.11 | 0.00 | Bacteroidota     | Bacteroidia    | Muribaculaceae  | Muribaculum | Muribaculum sp002492595 |
| Zotu4473 | 0.14 | 0.00 | Bacteroidota     | Bacteroidia    | Muribaculaceae  | Muribaculum | Muribaculum sp002492595 |
| Zotu5048 | 0.06 | 0.00 | Bacteroidota     | Bacteroidia    | Muribaculaceae  | Muribaculum | Muribaculum sp002492595 |
| Zotu4025 | 0.04 | 0.00 | Bacteroidota     | Bacteroidia    | Muribaculaceae  | Muribaculum | Muribaculum sp002492595 |
| Zotu5809 | 0.12 | 0.00 | Bacteroidota     | Bacteroidia    | Muribaculaceae  | Muribaculum | Muribaculum sp002492595 |
| Zotu4089 | 0.17 | 0.00 | Bacteroidota     | Bacteroidia    | Muribaculaceae  | Muribaculum | Muribaculum sp002492595 |
| Zotu4227 | 0.09 | 0.00 | Bacteroidota     | Bacteroidia    | Muribaculaceae  | Muribaculum | Muribaculum sp002492595 |
| Zotu5217 | 0.06 | 0.00 | Bacteroidota     | Bacteroidia    | Muribaculaceae  | Muribaculum | Muribaculum sp002492595 |
| Zotu5577 | 0.05 | 0.00 | Bacteroidota     | Bacteroidia    | Muribaculaceae  | Muribaculum | Muribaculum sp002492595 |
| Zotu4197 | 0.18 | 0.00 | Bacteroidota     | Bacteroidia    | Muribaculaceae  | Muribaculum | Muribaculum sp002492595 |
| Zotu2681 | 0.11 | 0.00 | Bacteroidota     | Bacteroidia    | Muribaculaceae  | Muribaculum | Muribaculum sp002492595 |
| Zotu3028 | 0.06 | 0.00 | Bacteroidota     | Bacteroidia    | Muribaculaceae  | Muribaculum | Muribaculum sp002492595 |
| Zotu4991 | 0.04 | 0.00 | Bacteroidota     | Bacteroidia    | Muribaculaceae  | Muribaculum | Muribaculum sp002492595 |
| Zotu6229 | 0.02 | 0.00 | Bacteroidota     | Bacteroidia    | Muribaculaceae  | Muribaculum | Muribaculum sp002492595 |
| Zotu6469 | 0.03 | 0.00 | Bacteroidota     | Bacteroidia    | Muribaculaceae  | Muribaculum | Muribaculum sp002492595 |
| Zotu6156 | 0.10 | 0.00 | Bacteroidota     | Bacteroidia    | Muribaculaceae  | Muribaculum | Muribaculum sp002492595 |
| Zotu2423 | 0.04 | 0.00 | Bacteroidota     | Bacteroidia    | Muribaculaceae  | Muribaculum | Muribaculum sp002492595 |
| Zotu4819 | 0.07 | 0.00 | Bacteroidota     | Bacteroidia    | Muribaculaceae  | Muribaculum | Muribaculum sp002492595 |
| Zotu5215 | 0.04 | 0.00 | Bacteroidota     | Bacteroidia    | Muribaculaceae  | Muribaculum | Muribaculum sp002492595 |
| Zotu2528 | 0.04 | 0.00 | Bacteroidota     | Bacteroidia    | Muribaculaceae  | Muribaculum | Muribaculum sp002492595 |
| Zotu5445 | 0.02 | 0.00 | Bacteroidota     | Bacteroidia    | Muribaculaceae  | Muribaculum | Muribaculum sp002492595 |
| Zotu5255 | 0.08 | 0.00 | Bacteroidota     | Bacteroidia    | Muribaculaceae  | Muribaculum | Muribaculum sp002492595 |
| Zotu5862 | 0.03 | 0.00 | Bacteroidota     | Bacteroidia    | Muribaculaceae  | Muribaculum | Muribaculum sp002492595 |
| Zotu4527 | 0.06 | 0.00 | Bacteroidota     | Bacteroidia    | Muribaculaceae  | Muribaculum | Muribaculum sp002492595 |
| Zotu6607 | 0.07 | 0.00 | Bacteroidota     | Bacteroidia    | Muribaculaceae  | Muribaculum | Muribaculum sp002492595 |
| Zotu3584 | 0.03 | 0.00 | Bacteroidota     | Bacteroidia    | Muribaculaceae  | Muribaculum | Muribaculum sp002492595 |
| Zotu6093 | 0.03 | 0.00 | Bacteroidota     | Bacteroidia    | Muribaculaceae  | Muribaculum | Muribaculum sp002492595 |
| Zotu6638 | 0.07 | 0.00 | Bacteroidota     | Bacteroidia    | Muribaculaceae  | Muribaculum | Muribaculum sp002492595 |
| Zotu4859 | 0.04 | 0.00 | Bacteroidota     | Bacteroidia    | Muribaculaceae  | Muribaculum | Muribaculum sp002492595 |
| Zotu5152 | 0.03 | 0.00 | Bacteroidota     | Bacteroidia    | Muribaculaceae  | Muribaculum | Muribaculum sp002492595 |

|          |      |      |                  |                  |                     |               |                           |
|----------|------|------|------------------|------------------|---------------------|---------------|---------------------------|
| Zotu6493 | 0.02 | 0.00 | Bacteroidota     | Bacteroidia      | Muribaculaceae      | Muribaculum   | Muribaculum sp002492595   |
| Zotu6097 | 0.03 | 0.00 | Bacteroidota     | Bacteroidia      | Muribaculaceae      | Muribaculum   | Muribaculum sp002492595   |
| Zotu5484 | 0.04 | 0.00 | Bacteroidota     | Bacteroidia      | Muribaculaceae      | Muribaculum   | Muribaculum sp002492595   |
| Zotu5534 | 0.02 | 0.00 | Bacteroidota     | Bacteroidia      | Muribaculaceae      | Muribaculum   | Muribaculum sp002492595   |
| Zotu6489 | 0.03 | 0.00 | Bacteroidota     | Bacteroidia      | Muribaculaceae      | Muribaculum   | Muribaculum sp002492595   |
| Zotu6460 | 0.02 | 0.00 | Bacteroidota     | Bacteroidia      | Muribaculaceae      | Muribaculum   | Muribaculum sp002492595   |
| Zotu5572 | 0.02 | 0.00 | Bacteroidota     | Bacteroidia      | Muribaculaceae      | Muribaculum   | Muribaculum sp002492595   |
| Zotu6595 | 0.04 | 0.00 | Bacteroidota     | Bacteroidia      | Muribaculaceae      | Muribaculum   | Muribaculum sp002492595   |
| Zotu5658 | 0.02 | 0.00 | Bacteroidota     | Bacteroidia      | Muribaculaceae      | Muribaculum   | Muribaculum sp002492595   |
| Zotu5634 | 0.02 | 0.00 | Bacteroidota     | Bacteroidia      | Muribaculaceae      | Muribaculum   | Muribaculum sp002492595   |
| Zotu5807 | 0.03 | 0.00 | Bacteroidota     | Bacteroidia      | Muribaculaceae      | Muribaculum   | Muribaculum sp002492595   |
| Zotu5716 | 0.02 | 0.00 | Bacteroidota     | Bacteroidia      | Muribaculaceae      | Muribaculum   | Muribaculum sp002492595   |
| Zotu5951 | 0.02 | 0.00 | Bacteroidota     | Bacteroidia      | Muribaculaceae      | Muribaculum   | Muribaculum sp002492595   |
| Zotu3894 | 0.04 | 0.00 | Bacteroidota     | Bacteroidia      | Muribaculaceae      | Muribaculum   | Muribaculum sp002492595   |
| Zotu5743 | 0.02 | 0.00 | Bacteroidota     | Bacteroidia      | Muribaculaceae      | Muribaculum   | Muribaculum sp002492595   |
| Zotu4941 | 0.07 | 0.00 | Bacteroidota     | Bacteroidia      | Muribaculaceae      | Muribaculum   | Vibrio parahaemolyticus   |
| Zotu5804 | 0.04 | 0.00 | Bacteroidota     | Bacteroidia      | Muribaculaceae      | UBA7173       | UBA7173 sp004102805       |
| Zotu4753 | 0.05 | 0.00 | Bacteroidota     | Bacteroidia      | Muribaculaceae      | UBA7173       | UBA7173 sp004102805       |
| Zotu6105 | 0.05 | 0.00 | Bacteroidota     | Bacteroidia      | Muribaculaceae      | Vibrio        | Vibrio parahaemolyticus   |
| Zotu6700 | 0.03 | 0.00 | Bacteroidota     | Bacteroidia      | Muribaculaceae      | Vibrio        | Vibrio parahaemolyticus   |
| Zotu4475 | 0.05 | 0.00 | Bacteroidota     | Bacteroidia      | Muribaculaceae      | Vibrio        | Vibrio parahaemolyticus   |
| Zotu5865 | 0.03 | 0.00 | Desulfobacterota | Desulfovibrionia | Desulfovibrionaceae | Desulfovibrio | Desulfovibrio sp003860215 |
| Zotu3742 | 0.06 | 0.00 | Desulfobacterota | Desulfovibrionia | Desulfovibrionaceae | Desulfovibrio | Desulfovibrio sp003860215 |
| Zotu5370 | 0.02 | 0.00 | Desulfobacterota | Desulfovibrionia | Desulfovibrionaceae | Desulfovibrio | Desulfovibrio sp003860215 |
| Zotu3774 | 0.02 | 0.00 | Desulfobacterota | Desulfovibrionia | Desulfovibrionaceae | Desulfovibrio | Desulfovibrio sp003860215 |
| Zotu3238 | 0.02 | 0.00 | Desulfobacterota | Desulfovibrionia | Desulfovibrionaceae | Desulfovibrio | Desulfovibrio sp900547595 |
| Zotu4155 | 0.05 | 0.00 | Desulfobacterota | Desulfovibrionia | Desulfovibrionaceae | Desulfovibrio | Desulfovibrio sp900547595 |
| Zotu5342 | 0.01 | 0.00 | Desulfobacterota | Desulfovibrionia | Desulfovibrionaceae | Desulfovibrio | Desulfovibrio sp900547595 |
| Zotu3812 | 0.04 | 0.00 | Desulfobacterota | Desulfovibrionia | Desulfovibrionaceae | Desulfovibrio | Desulfovibrio sp900547595 |
| Zotu4998 | 0.02 | 0.00 | Desulfobacterota | Desulfovibrionia | Desulfovibrionaceae | Desulfovibrio | Desulfovibrio sp900547595 |
| Zotu4009 | 0.03 | 0.00 | Desulfobacterota | Desulfovibrionia | Desulfovibrionaceae | Desulfovibrio | Desulfovibrio sp900547595 |
| Zotu6629 | 0.02 | 0.00 | Desulfobacterota | Desulfovibrionia | Desulfovibrionaceae | Desulfovibrio | Desulfovibrio sp900547595 |
| Zotu4327 | 0.02 | 0.00 | Desulfobacterota | Desulfovibrionia | Desulfovibrionaceae | Desulfovibrio | Desulfovibrio sp900547595 |
| Zotu4782 | 0.03 | 0.00 | Desulfobacterota | Desulfovibrionia | Desulfovibrionaceae | Desulfovibrio | Desulfovibrio sp900547595 |
| Zotu4439 | 0.05 | 0.00 | Desulfobacterota | Desulfovibrionia | Desulfovibrionaceae | Desulfovibrio | Desulfovibrio sp900547595 |
| Zotu6265 | 0.02 | 0.00 | Desulfobacterota | Desulfovibrionia | Desulfovibrionaceae | Desulfovibrio | Desulfovibrio sp900547595 |
| Zotu4964 | 0.01 | 0.00 | Desulfobacterota | Desulfovibrionia | Desulfovibrionaceae | Desulfovibrio | Desulfovibrio sp900547595 |

|          |      |      |                |                     |                           |                      |                                    |
|----------|------|------|----------------|---------------------|---------------------------|----------------------|------------------------------------|
| Zotu5179 | 0.00 | 0.03 | Firmicutes A   | Clostridia          | <i>Clostridiaceae</i>     | <i>Clostridium</i>   | <i>Clostridium saudiense</i>       |
| Zotu6695 | 0.00 | 0.21 | Firmicutes A   | Clostridia          | <i>Lachnospiraceae</i>    | <i>Bacteroides</i> F | <i>Bacteroides_F pectinophilus</i> |
| Zotu5489 | 0.00 | 0.46 | Firmicutes A   | Clostridia          | <i>Lachnospiraceae</i>    | <i>Bacteroides</i> F | <i>Bacteroides_F pectinophilus</i> |
| Zotu5932 | 0.00 | 0.14 | Firmicutes A   | Clostridia          | <i>Lachnospiraceae</i>    | <i>Bacteroides</i> F | <i>Bacteroides_F pectinophilus</i> |
| Zotu6424 | 0.00 | 0.23 | Firmicutes A   | Clostridia          | <i>Lachnospiraceae</i>    | <i>Bacteroides</i> F | <i>Bacteroides_F pectinophilus</i> |
| Zotu4341 | 0.00 | 0.29 | Firmicutes A   | Clostridia          | <i>Lachnospiraceae</i>    | <i>Bacteroides</i> F | <i>Bacteroides_F pectinophilus</i> |
| Zotu6321 | 0.80 | 0.00 | Firmicutes A   | Clostridia          | <i>Lachnospiraceae</i>    | <i>Enterocloster</i> | <i>Acetatifactor</i> sp900066565   |
| Zotu6659 | 0.01 | 0.00 | Firmicutes A   | Clostridia          | <i>Lachnospiraceae</i>    | <i>Kineothrix</i>    | <i>Kineothrix alysoides</i>        |
| Zotu1092 | 0.00 | 0.04 | Proteobacteria | Gammaproteobacteria | <i>Enterobacteriaceae</i> | <i>Cronobacter</i>   | <i>Akkermansia muciniphila</i>     |
| Zotu1361 | 0.00 | 0.02 | Proteobacteria | Gammaproteobacteria | <i>Enterobacteriaceae</i> | <i>Cronobacter</i>   | <i>Akkermansia muciniphila</i>     |
| Zotu682  | 0.00 | 0.03 | Proteobacteria | Gammaproteobacteria | <i>Enterobacteriaceae</i> | <i>Cronobacter</i>   | <i>Akkermansia muciniphila</i>     |
| Zotu627  | 0.00 | 0.03 | Proteobacteria | Gammaproteobacteria | <i>Enterobacteriaceae</i> | <i>Cronobacter</i>   | <i>Cronobacter malonaticus</i>     |
| Zotu832  | 0.00 | 0.02 | Proteobacteria | Gammaproteobacteria | <i>Enterobacteriaceae</i> | <i>Cronobacter</i>   | <i>Cronobacter malonaticus</i>     |
| Zotu861  | 0.00 | 0.01 | Proteobacteria | Gammaproteobacteria | <i>Enterobacteriaceae</i> | <i>Cronobacter</i>   | <i>Cronobacter malonaticus</i>     |
| Zotu773  | 0.00 | 0.01 | Proteobacteria | Gammaproteobacteria | <i>Enterobacteriaceae</i> | <i>Cronobacter</i>   | <i>Cronobacter malonaticus</i>     |
| Zotu1665 | 0.00 | 0.02 | Proteobacteria | Gammaproteobacteria | <i>Enterobacteriaceae</i> | <i>Cronobacter</i>   | <i>Cronobacter malonaticus</i>     |
| Zotu595  | 0.00 | 0.08 | Proteobacteria | Gammaproteobacteria | <i>Enterobacteriaceae</i> | <i>Cronobacter</i>   | <i>Cronobacter malonaticus</i>     |
| Zotu1458 | 0.00 | 0.01 | Proteobacteria | Gammaproteobacteria | <i>Enterobacteriaceae</i> | <i>Cronobacter</i>   | <i>Cronobacter malonaticus</i>     |
| Zotu445  | 0.00 | 0.09 | Proteobacteria | Gammaproteobacteria | <i>Enterobacteriaceae</i> | <i>Cronobacter</i>   | <i>Cronobacter malonaticus</i>     |
| Zotu352  | 0.00 | 0.06 | Proteobacteria | Gammaproteobacteria | <i>Enterobacteriaceae</i> | <i>Cronobacter</i>   | <i>Cronobacter malonaticus</i>     |
| Zotu1176 | 0.00 | 0.01 | Proteobacteria | Gammaproteobacteria | <i>Enterobacteriaceae</i> | <i>Cronobacter</i>   | <i>Cronobacter malonaticus</i>     |
| Zotu1279 | 0.00 | 0.04 | Proteobacteria | Gammaproteobacteria | <i>Enterobacteriaceae</i> | <i>Cronobacter</i>   | <i>Cronobacter malonaticus</i>     |

|          |      |      |                |                     |                    |             |                                |
|----------|------|------|----------------|---------------------|--------------------|-------------|--------------------------------|
| Zotu827  | 0.00 | 0.02 | Proteobacteria | Gammaproteobacteria | Enterobacteriaceae | Cronobacter | <i>Cronobacter malonaticus</i> |
| Zotu610  | 0.00 | 0.03 | Proteobacteria | Gammaproteobacteria | Enterobacteriaceae | Cronobacter | <i>Cronobacter malonaticus</i> |
| Zotu818  | 0.00 | 0.02 | Proteobacteria | Gammaproteobacteria | Enterobacteriaceae | Cronobacter | <i>Cronobacter malonaticus</i> |
| Zotu931  | 0.00 | 0.02 | Proteobacteria | Gammaproteobacteria | Enterobacteriaceae | Cronobacter | <i>Cronobacter malonaticus</i> |
| Zotu1470 | 0.00 | 0.01 | Proteobacteria | Gammaproteobacteria | Enterobacteriaceae | Cronobacter | <i>Cronobacter malonaticus</i> |
| Zotu1322 | 0.00 | 0.01 | Proteobacteria | Gammaproteobacteria | Enterobacteriaceae | Cronobacter | <i>Cronobacter malonaticus</i> |
| Zotu1822 | 0.00 | 0.01 | Proteobacteria | Gammaproteobacteria | Enterobacteriaceae | Cronobacter | <i>Cronobacter malonaticus</i> |
| Zotu406  | 0.00 | 0.03 | Proteobacteria | Gammaproteobacteria | Enterobacteriaceae | Cronobacter | <i>Cronobacter malonaticus</i> |
| Zotu855  | 0.00 | 0.03 | Proteobacteria | Gammaproteobacteria | Enterobacteriaceae | Cronobacter | <i>Cronobacter sakazakii</i>   |
| Zotu1009 | 0.00 | 0.02 | Proteobacteria | Gammaproteobacteria | Enterobacteriaceae | Cronobacter | <i>Cronobacter sakazakii</i>   |
| Zotu918  | 0.00 | 0.03 | Proteobacteria | Gammaproteobacteria | Enterobacteriaceae | Cronobacter | <i>Cronobacter sakazakii</i>   |
| Zotu428  | 0.00 | 0.02 | Proteobacteria | Gammaproteobacteria | Enterobacteriaceae | Cronobacter | <i>Cronobacter sakazakii</i>   |
| Zotu1658 | 0.00 | 0.03 | Proteobacteria | Gammaproteobacteria | Enterobacteriaceae | Cronobacter | <i>Cronobacter sakazakii</i>   |
| Zotu765  | 0.00 | 0.02 | Proteobacteria | Gammaproteobacteria | Enterobacteriaceae | Cronobacter | <i>Cronobacter sakazakii</i>   |
| Zotu888  | 0.00 | 0.01 | Proteobacteria | Gammaproteobacteria | Enterobacteriaceae | Cronobacter | <i>Cronobacter sakazakii</i>   |
| Zotu1081 | 0.00 | 0.01 | Proteobacteria | Gammaproteobacteria | Enterobacteriaceae | Cronobacter | <i>Cronobacter sakazakii</i>   |
| Zotu781  | 0.00 | 0.01 | Proteobacteria | Gammaproteobacteria | Enterobacteriaceae | Cronobacter | <i>Cronobacter sakazakii</i>   |
| Zotu720  | 0.00 | 0.07 | Proteobacteria | Gammaproteobacteria | Enterobacteriaceae | Cronobacter | <i>Cronobacter sakazakii</i>   |

|          |      |      |                |                     |                    |             |                       |
|----------|------|------|----------------|---------------------|--------------------|-------------|-----------------------|
| Zotu878  | 0.00 | 0.06 | Proteobacteria | Gammaproteobacteria | Enterobacteriaceae | Cronobacter | Cronobacter sakazakii |
| Zotu1000 | 0.00 | 0.01 | Proteobacteria | Gammaproteobacteria | Enterobacteriaceae | Cronobacter | Cronobacter sakazakii |
| Zotu1316 | 0.00 | 0.01 | Proteobacteria | Gammaproteobacteria | Enterobacteriaceae | Cronobacter | Cronobacter sakazakii |
| Zotu1523 | 0.00 | 0.01 | Proteobacteria | Gammaproteobacteria | Enterobacteriaceae | Cronobacter | Cronobacter sakazakii |
| Zotu706  | 0.00 | 0.03 | Proteobacteria | Gammaproteobacteria | Enterobacteriaceae | Cronobacter | Cronobacter sakazakii |
| Zotu1909 | 0.00 | 0.01 | Proteobacteria | Gammaproteobacteria | Enterobacteriaceae | Cronobacter | Cronobacter sakazakii |
| Zotu1152 | 0.00 | 0.02 | Proteobacteria | Gammaproteobacteria | Enterobacteriaceae | Cronobacter | Cronobacter sakazakii |
| Zotu1367 | 0.00 | 0.02 | Proteobacteria | Gammaproteobacteria | Enterobacteriaceae | Cronobacter | Cronobacter sakazakii |
| Zotu1720 | 0.00 | 0.01 | Proteobacteria | Gammaproteobacteria | Enterobacteriaceae | Cronobacter | Cronobacter sakazakii |
| Zotu381  | 0.00 | 0.05 | Proteobacteria | Gammaproteobacteria | Enterobacteriaceae | Cronobacter | Cronobacter sakazakii |
| Zotu736  | 0.00 | 0.04 | Proteobacteria | Gammaproteobacteria | Enterobacteriaceae | Cronobacter | Cronobacter sakazakii |
| Zotu1077 | 0.00 | 0.04 | Proteobacteria | Gammaproteobacteria | Enterobacteriaceae | Cronobacter | Cronobacter sakazakii |
| Zotu997  | 0.00 | 0.01 | Proteobacteria | Gammaproteobacteria | Enterobacteriaceae | Cronobacter | Cronobacter sakazakii |
| Zotu974  | 0.00 | 0.02 | Proteobacteria | Gammaproteobacteria | Enterobacteriaceae | Cronobacter | Cronobacter sakazakii |
| Zotu1038 | 0.00 | 0.02 | Proteobacteria | Gammaproteobacteria | Enterobacteriaceae | Cronobacter | Cronobacter sakazakii |
| Zotu1432 | 0.00 | 0.02 | Proteobacteria | Gammaproteobacteria | Enterobacteriaceae | Cronobacter | Cronobacter sakazakii |
| Zotu726  | 0.00 | 0.02 | Proteobacteria | Gammaproteobacteria | Enterobacteriaceae | Cronobacter | Cronobacter sakazakii |
| Zotu1293 | 0.00 | 0.01 | Proteobacteria | Gammaproteobacteria | Enterobacteriaceae | Cronobacter | Cronobacter sakazakii |



|          |      |      |                   |                     |                    |             |                         |
|----------|------|------|-------------------|---------------------|--------------------|-------------|-------------------------|
| Zotu1773 | 0.00 | 0.01 | Proteobacteria    | Gammaproteobacteria | Enterobacteriaceae | Cronobacter | Cronobacter sakazakii   |
| Zotu576  | 0.00 | 0.03 | Proteobacteria    | Gammaproteobacteria | Enterobacteriaceae | Cronobacter | Cronobacter sakazakii   |
| Zotu821  | 0.00 | 0.01 | Proteobacteria    | Gammaproteobacteria | Enterobacteriaceae | Cronobacter | Cronobacter sakazakii   |
| Zotu695  | 0.00 | 0.15 | Verrucomicrobiota | Verrucomicrobiae    | Akkermansiaceae    | Akkermansia | Akkermansia muciniphila |
| Zotu1477 | 0.00 | 0.02 | Verrucomicrobiota | Verrucomicrobiae    | Akkermansiaceae    | Akkermansia | Akkermansia muciniphila |
| Zotu920  | 0.00 | 0.04 | Verrucomicrobiota | Verrucomicrobiae    | Akkermansiaceae    | Akkermansia | Akkermansia muciniphila |
| Zotu505  | 0.00 | 0.04 | Verrucomicrobiota | Verrucomicrobiae    | Akkermansiaceae    | Akkermansia | Akkermansia muciniphila |
| Zotu1011 | 0.00 | 0.05 | Verrucomicrobiota | Verrucomicrobiae    | Akkermansiaceae    | Akkermansia | Akkermansia muciniphila |
| Zotu721  | 0.00 | 0.05 | Verrucomicrobiota | Verrucomicrobiae    | Akkermansiaceae    | Akkermansia | Akkermansia muciniphila |
| Zotu724  | 0.00 | 0.04 | Verrucomicrobiota | Verrucomicrobiae    | Akkermansiaceae    | Akkermansia | Akkermansia muciniphila |
| Zotu801  | 0.00 | 0.02 | Verrucomicrobiota | Verrucomicrobiae    | Akkermansiaceae    | Akkermansia | Akkermansia muciniphila |
| Zotu1102 | 0.00 | 0.04 | Verrucomicrobiota | Verrucomicrobiae    | Akkermansiaceae    | Akkermansia | Akkermansia muciniphila |
| Zotu1115 | 0.00 | 0.02 | Verrucomicrobiota | Verrucomicrobiae    | Akkermansiaceae    | Akkermansia | Akkermansia muciniphila |
| Zotu1330 | 0.00 | 0.07 | Verrucomicrobiota | Verrucomicrobiae    | Akkermansiaceae    | Akkermansia | Akkermansia muciniphila |
| Zotu1416 | 0.00 | 0.01 | Verrucomicrobiota | Verrucomicrobiae    | Akkermansiaceae    | Akkermansia | Akkermansia muciniphila |
| Zotu1395 | 0.00 | 0.01 | Verrucomicrobiota | Verrucomicrobiae    | Akkermansiaceae    | Akkermansia | Akkermansia muciniphila |
| Zotu1133 | 0.00 | 0.02 | Verrucomicrobiota | Verrucomicrobiae    | Akkermansiaceae    | Akkermansia | Akkermansia muciniphila |
| Zotu1400 | 0.00 | 0.03 | Verrucomicrobiota | Verrucomicrobiae    | Akkermansiaceae    | Akkermansia | Akkermansia muciniphila |
| Zotu740  | 0.00 | 0.04 | Verrucomicrobiota | Verrucomicrobiae    | Akkermansiaceae    | Akkermansia | Akkermansia muciniphila |
| Zotu758  | 0.00 | 0.10 | Verrucomicrobiota | Verrucomicrobiae    | Akkermansiaceae    | Akkermansia | Akkermansia muciniphila |
| Zotu1389 | 0.00 | 0.02 | Verrucomicrobiota | Verrucomicrobiae    | Akkermansiaceae    | Akkermansia | Akkermansia muciniphila |
| Zotu1231 | 0.00 | 0.04 | Verrucomicrobiota | Verrucomicrobiae    | Akkermansiaceae    | Akkermansia | Akkermansia muciniphila |
| Zotu1346 | 0.00 | 0.01 | Verrucomicrobiota | Verrucomicrobiae    | Akkermansiaceae    | Akkermansia | Akkermansia muciniphila |
| Zotu757  | 0.00 | 0.04 | Verrucomicrobiota | Verrucomicrobiae    | Akkermansiaceae    | Akkermansia | Akkermansia muciniphila |
| Zotu2262 | 0.00 | 0.01 | Verrucomicrobiota | Verrucomicrobiae    | Akkermansiaceae    | Akkermansia | Akkermansia muciniphila |
| Zotu1160 | 0.00 | 0.01 | Verrucomicrobiota | Verrucomicrobiae    | Akkermansiaceae    | Akkermansia | Akkermansia muciniphila |

Table S3. Differential zOTU abundance between C and CCP rats.

| zOTU_ID  | C %  | CCP % | Phylum           | Class          | Family             | Genus           | Species                  |
|----------|------|-------|------------------|----------------|--------------------|-----------------|--------------------------|
| Zotu5347 | 0.01 | 0.00  | Actinobacteriota | Actinomycetia  | Bifidobacteriaceae | Bifidobacterium | Bifidobacterium criceti  |
| Zotu764  | 0.06 | 0.01  | Actinobacteriota | Actinomycetia  | Bifidobacteriaceae | Bifidobacterium | Bifidobacterium globosum |
| Zotu2358 | 0.02 | 0.00  | Actinobacteriota | Actinomycetia  | Bifidobacteriaceae | Bifidobacterium | Bifidobacterium globosum |
| Zotu488  | 0.08 | 0.01  | Actinobacteriota | Actinomycetia  | Bifidobacteriaceae | Bifidobacterium | Bifidobacterium globosum |
| Zotu1253 | 0.04 | 0.00  | Actinobacteriota | Actinomycetia  | Bifidobacteriaceae | Bifidobacterium | Bifidobacterium globosum |
| Zotu5206 | 0.00 | 0.13  | Actinobacteriota | Coriobacteriia | Eggerthellaceae    | CAG-1427        | CAG-1427 sp000435675     |
| Zotu5037 | 0.26 | 0.00  | Bacteroidota     | Bacteroidia    | Muribaculaceae     | Muribaculum     | Muribaculum intestinale  |
| Zotu5281 | 0.11 | 0.00  | Bacteroidota     | Bacteroidia    | Muribaculaceae     | Muribaculum     | Muribaculum sp001701195  |
| Zotu4405 | 0.08 | 0.00  | Bacteroidota     | Bacteroidia    | Muribaculaceae     | Muribaculum     | Muribaculum sp001701195  |
| Zotu4819 | 0.04 | 0.00  | Bacteroidota     | Bacteroidia    | Muribaculaceae     | Muribaculum     | Muribaculum sp002492595  |
| Zotu2681 | 0.07 | 0.00  | Bacteroidota     | Bacteroidia    | Muribaculaceae     | Muribaculum     | Muribaculum sp002492595  |
| Zotu6607 | 0.04 | 0.00  | Bacteroidota     | Bacteroidia    | Muribaculaceae     | Muribaculum     | Muribaculum sp002492595  |
| Zotu4197 | 0.11 | 0.00  | Bacteroidota     | Bacteroidia    | Muribaculaceae     | Muribaculum     | Muribaculum sp002492595  |
| Zotu2676 | 0.03 | 0.00  | Bacteroidota     | Bacteroidia    | Muribaculaceae     | Muribaculum     | Muribaculum sp002492595  |
| Zotu4089 | 0.10 | 0.00  | Bacteroidota     | Bacteroidia    | Muribaculaceae     | Muribaculum     | Muribaculum sp002492595  |
| Zotu6095 | 0.02 | 0.00  | Bacteroidota     | Bacteroidia    | Muribaculaceae     | Muribaculum     | Muribaculum sp002492595  |
| Zotu5809 | 0.05 | 0.00  | Bacteroidota     | Bacteroidia    | Muribaculaceae     | Muribaculum     | Muribaculum sp002492595  |
| Zotu4060 | 0.01 | 0.00  | Bacteroidota     | Bacteroidia    | Muribaculaceae     | Muribaculum     | Muribaculum sp002492595  |
| Zotu5255 | 0.05 | 0.00  | Bacteroidota     | Bacteroidia    | Muribaculaceae     | Muribaculum     | Muribaculum sp002492595  |
| Zotu4473 | 0.09 | 0.00  | Bacteroidota     | Bacteroidia    | Muribaculaceae     | Muribaculum     | Muribaculum sp002492595  |
| Zotu5561 | 0.06 | 0.00  | Bacteroidota     | Bacteroidia    | Muribaculaceae     | Muribaculum     | Muribaculum sp002492595  |
| Zotu3028 | 0.04 | 0.00  | Bacteroidota     | Bacteroidia    | Muribaculaceae     | Muribaculum     | Muribaculum sp002492595  |
| Zotu5275 | 0.02 | 0.00  | Bacteroidota     | Bacteroidia    | Muribaculaceae     | UBA7173         | UBA7173 sp004102805      |
| Zotu4753 | 0.08 | 0.00  | Bacteroidota     | Bacteroidia    | Muribaculaceae     | UBA7173         | UBA7173 sp004102805      |
| Zotu5804 | 0.04 | 0.00  | Bacteroidota     | Bacteroidia    | Muribaculaceae     | UBA7173         | UBA7173 sp004102805      |
| Zotu4475 | 0.08 | 0.00  | Bacteroidota     | Bacteroidia    | Muribaculaceae     | Vibrio          | Vibrio parahaemolyticus  |
| Zotu6700 | 0.01 | 0.00  | Bacteroidota     | Bacteroidia    | Muribaculaceae     | Vibrio          | Vibrio parahaemolyticus  |
| Zotu5502 | 0.06 | 0.00  | Firmicutes A     | Clostridia     | Lachnospiraceae    | 1XD8-76         | 1XD8-76 sp003611955      |
| Zotu4372 | 0.05 | 0.00  | Firmicutes A     | Clostridia     | Lachnospiraceae    | 1XD8-76         | 1XD8-76 sp003611955      |
| Zotu5712 | 0.55 | 0.01  | Firmicutes A     | Clostridia     | Lachnospiraceae    | Roseburia       | Roseburia intestinalis   |
| Zotu4829 | 0.03 | 0.00  | Firmicutes A     | Clostridia     | UBA1381            | CAG-41          | CAG-41 sp900066215       |
| Zotu3815 | 0.09 | 0.00  | Firmicutes A     | Clostridia     | UBA1381            | CAG-41          | CAG-41 sp900066215       |
| Zotu6673 | 0.02 | 0.00  | Firmicutes A     | Clostridia     | UBA1381            | CAG-41          | CAG-41 sp900066215       |
| Zotu5719 | 0.02 | 0.00  | Firmicutes A     | Clostridia     | UBA1381            | CAG-41          | CAG-41 sp900066215       |
| Zotu6477 | 0.03 | 0.00  | Firmicutes A     | Clostridia     | UBA1381            | CAG-41          | CAG-41 sp900066215       |
| Zotu4238 | 0.08 | 0.00  | Firmicutes A     | Clostridia     | UBA1381            | CAG-41          | CAG-41 sp900066215       |
| Zotu4536 | 0.09 | 0.00  | Firmicutes A     | Clostridia     | UBA1381            | CAG-41          | CAG-41 sp900066215       |
| Zotu4850 | 0.05 | 0.00  | Firmicutes A     | Clostridia     | UBA1381            | CAG-41          | CAG-41 sp900066215       |
| Zotu4676 | 0.03 | 0.00  | Firmicutes A     | Clostridia     | UBA1381            | CAG-41          | CAG-41 sp900066215       |

|          |      |      |                |                     |                    |             |                         |
|----------|------|------|----------------|---------------------|--------------------|-------------|-------------------------|
| Zotu4177 | 0.07 | 0.00 | Firmicutes A   | Clostridia          | UBA1381            | CAG-41      | CAG-41 sp900066215      |
| Zotu5450 | 0.01 | 0.00 | Firmicutes A   | Clostridia          | Oscillospiraceae   | CAG-83      | CAG-83 sp000431575      |
| Zotu6368 | 0.40 | 0.01 | Proteobacteria | Gammaproteobacteria | Enterobacteriaceae | Cronobacter | Cronobacter sakazakii   |
| Zotu439  | 0.03 | 0.00 | Proteobacteria | Gammaproteobacteria | Enterobacteriaceae | Salmonella  | Salmonella enterica     |
| Zotu693  | 0.07 | 0.01 | Proteobacteria | Gammaproteobacteria | Enterobacteriaceae | Salmonella  | Salmonella enterica     |
| Zotu2590 | 0.01 | 0.00 | Proteobacteria | Gammaproteobacteria | Enterobacteriaceae | Salmonella  | Salmonella enterica     |
| Zotu1178 | 0.02 | 0.00 | Proteobacteria | Gammaproteobacteria | Enterobacteriaceae | Salmonella  | Salmonella enterica     |
| Zotu503  | 0.02 | 0.00 | Proteobacteria | Gammaproteobacteria | Enterobacteriaceae | Salmonella  | Salmonella enterica     |
| Zotu1538 | 0.01 | 0.00 | Proteobacteria | Gammaproteobacteria | Enterobacteriaceae | Salmonella  | Salmonella enterica     |
| Zotu521  | 0.04 | 0.00 | Proteobacteria | Gammaproteobacteria | Enterobacteriaceae | Salmonella  | Salmonella enterica     |
| Zotu800  | 0.03 | 0.00 | Proteobacteria | Gammaproteobacteria | Enterobacteriaceae | Salmonella  | Salmonella enterica     |
| Zotu446  | 0.03 | 0.00 | Proteobacteria | Gammaproteobacteria | Enterobacteriaceae | Salmonella  | Salmonella enterica     |
| Zotu438  | 0.02 | 0.00 | Proteobacteria | Gammaproteobacteria | Enterobacteriaceae | Salmonella  | Salmonella enterica     |
| Zotu581  | 0.03 | 0.00 | Proteobacteria | Gammaproteobacteria | Enterobacteriaceae | Salmonella  | Salmonella enterica     |
| Zotu3454 | 0.03 | 0.00 | Proteobacteria | Gammaproteobacteria | Vibrionaceae       | Vibrio      | Vibrio parahaemolyticus |
| Zotu5267 | 0.02 | 0.00 | Proteobacteria | Gammaproteobacteria | Vibrionaceae       | Vibrio      | Vibrio parahaemolyticus |
| Zotu3400 | 0.03 | 0.00 | Proteobacteria | Gammaproteobacteria | Vibrionaceae       | Vibrio      | Vibrio parahaemolyticus |
| Zotu2297 | 0.04 | 0.00 | Proteobacteria | Gammaproteobacteria | Vibrionaceae       | Vibrio      | Vibrio parahaemolyticus |
| Zotu3049 | 0.05 | 0.00 | Proteobacteria | Gammaproteobacteria | Vibrionaceae       | Vibrio      | Vibrio parahaemolyticus |
| Zotu6568 | 0.02 | 0.00 | Proteobacteria | Gammaproteobacteria | Vibrionaceae       | Vibrio      | Vibrio parahaemolyticus |
| Zotu3272 | 0.03 | 0.00 | Proteobacteria | Gammaproteobacteria | Vibrionaceae       | Vibrio      | Vibrio parahaemolyticus |
| Zotu3646 | 0.01 | 0.00 | Proteobacteria | Gammaproteobacteria | Vibrionaceae       | Vibrio      | Vibrio parahaemolyticus |
| Zotu6219 | 0.04 | 0.00 | Proteobacteria | Gammaproteobacteria | Vibrionaceae       | Vibrio      | Vibrio parahaemolyticus |
| Zotu5169 | 0.25 | 0.01 | Proteobacteria | Gammaproteobacteria | Vibrionaceae       | Vibrio      | Vibrio parahaemolyticus |
| Zotu3392 | 0.02 | 0.00 | Proteobacteria | Gammaproteobacteria | Vibrionaceae       | Vibrio      | Vibrio parahaemolyticus |
| Zotu3803 | 0.01 | 0.00 | Proteobacteria | Gammaproteobacteria | Vibrionaceae       | Vibrio      | Vibrio parahaemolyticus |
| Zotu2412 | 0.05 | 0.00 | Proteobacteria | Gammaproteobacteria | Vibrionaceae       | Vibrio      | Vibrio parahaemolyticus |
| Zotu2947 | 0.02 | 0.00 | Proteobacteria | Gammaproteobacteria | Vibrionaceae       | Vibrio      | Vibrio parahaemolyticus |
| Zotu3687 | 0.02 | 0.00 | Proteobacteria | Gammaproteobacteria | Vibrionaceae       | Vibrio      | Vibrio parahaemolyticus |
| Zotu2594 | 0.06 | 0.00 | Proteobacteria | Gammaproteobacteria | Vibrionaceae       | Vibrio      | Vibrio parahaemolyticus |
| Zotu2835 | 0.05 | 0.00 | Proteobacteria | Gammaproteobacteria | Vibrionaceae       | Vibrio      | Vibrio parahaemolyticus |
| Zotu4806 | 0.02 | 0.00 | Proteobacteria | Gammaproteobacteria | Vibrionaceae       | Vibrio      | Vibrio parahaemolyticus |
| Zotu2420 | 0.02 | 0.00 | Proteobacteria | Gammaproteobacteria | Vibrionaceae       | Vibrio      | Vibrio parahaemolyticus |
| Zotu4966 | 0.05 | 0.00 | Proteobacteria | Gammaproteobacteria | Vibrionaceae       | Vibrio      | Vibrio parahaemolyticus |
| Zotu2666 | 0.01 | 0.00 | Proteobacteria | Gammaproteobacteria | Vibrionaceae       | Vibrio      | Vibrio parahaemolyticus |
| Zotu3351 | 0.01 | 0.00 | Proteobacteria | Gammaproteobacteria | Vibrionaceae       | Vibrio      | Vibrio parahaemolyticus |
| Zotu2854 | 0.03 | 0.00 | Proteobacteria | Gammaproteobacteria | Vibrionaceae       | Vibrio      | Vibrio parahaemolyticus |
| Zotu3370 | 0.02 | 0.00 | Proteobacteria | Gammaproteobacteria | Vibrionaceae       | Vibrio      | Vibrio parahaemolyticus |
| Zotu4366 | 0.04 | 0.00 | Proteobacteria | Gammaproteobacteria | Vibrionaceae       | Vibrio      | Vibrio parahaemolyticus |
| Zotu3675 | 0.05 | 0.00 | Proteobacteria | Gammaproteobacteria | Vibrionaceae       | Vibrio      | Vibrio parahaemolyticus |
| Zotu1922 | 0.02 | 0.00 | Proteobacteria | Gammaproteobacteria | Vibrionaceae       | Vibrio      | Vibrio parahaemolyticus |

[illegible]

**Table S4.** Differential zOTU abundance between H and HCP rats.

| zOTU_ID  | H%   | HCP% | Phylum           | Class          | Family          | Genus       | Species                 |
|----------|------|------|------------------|----------------|-----------------|-------------|-------------------------|
| Zotu5206 | 0.00 | 0.08 | Actinobacteriota | Coriobacteriia | Eggerthellaceae | CAG-1427    | CAG-1427 sp000435675    |
| Zotu5890 | 0.03 | 0.00 | Bacteroidota     | Bacteroidia    | Muribaculaceae  | Muribaculum | Muribaculum sp001701195 |
| Zotu5281 | 0.08 | 0.00 | Bacteroidota     | Bacteroidia    | Muribaculaceae  | Muribaculum | Muribaculum sp001701195 |
| Zotu4405 | 0.05 | 0.00 | Bacteroidota     | Bacteroidia    | Muribaculaceae  | Muribaculum | Muribaculum sp001701195 |
| Zotu5561 | 0.11 | 0.00 | Bacteroidota     | Bacteroidia    | Muribaculaceae  | Muribaculum | Muribaculum sp002492595 |
| Zotu4473 | 0.14 | 0.00 | Bacteroidota     | Bacteroidia    | Muribaculaceae  | Muribaculum | Muribaculum sp002492595 |
| Zotu5048 | 0.06 | 0.00 | Bacteroidota     | Bacteroidia    | Muribaculaceae  | Muribaculum | Muribaculum sp002492595 |
| Zotu4025 | 0.04 | 0.00 | Bacteroidota     | Bacteroidia    | Muribaculaceae  | Muribaculum | Muribaculum sp002492595 |
| Zotu5809 | 0.12 | 0.00 | Bacteroidota     | Bacteroidia    | Muribaculaceae  | Muribaculum | Muribaculum sp002492595 |
| Zotu4089 | 0.17 | 0.00 | Bacteroidota     | Bacteroidia    | Muribaculaceae  | Muribaculum | Muribaculum sp002492595 |
| Zotu4227 | 0.09 | 0.00 | Bacteroidota     | Bacteroidia    | Muribaculaceae  | Muribaculum | Muribaculum sp002492595 |
| Zotu5217 | 0.06 | 0.00 | Bacteroidota     | Bacteroidia    | Muribaculaceae  | Muribaculum | Muribaculum sp002492595 |
| Zotu5577 | 0.05 | 0.00 | Bacteroidota     | Bacteroidia    | Muribaculaceae  | Muribaculum | Muribaculum sp002492595 |
| Zotu4197 | 0.18 | 0.00 | Bacteroidota     | Bacteroidia    | Muribaculaceae  | Muribaculum | Muribaculum sp002492595 |
| Zotu2681 | 0.11 | 0.00 | Bacteroidota     | Bacteroidia    | Muribaculaceae  | Muribaculum | Muribaculum sp002492595 |
| Zotu3028 | 0.06 | 0.00 | Bacteroidota     | Bacteroidia    | Muribaculaceae  | Muribaculum | Muribaculum sp002492595 |
| Zotu4991 | 0.04 | 0.00 | Bacteroidota     | Bacteroidia    | Muribaculaceae  | Muribaculum | Muribaculum sp002492595 |
| Zotu6229 | 0.02 | 0.00 | Bacteroidota     | Bacteroidia    | Muribaculaceae  | Muribaculum | Muribaculum sp002492595 |
| Zotu6469 | 0.03 | 0.00 | Bacteroidota     | Bacteroidia    | Muribaculaceae  | Muribaculum | Muribaculum sp002492595 |
| Zotu6156 | 0.10 | 0.00 | Bacteroidota     | Bacteroidia    | Muribaculaceae  | Muribaculum | Muribaculum sp002492595 |
| Zotu2423 | 0.04 | 0.00 | Bacteroidota     | Bacteroidia    | Muribaculaceae  | Muribaculum | Muribaculum sp002492595 |
| Zotu4819 | 0.07 | 0.00 | Bacteroidota     | Bacteroidia    | Muribaculaceae  | Muribaculum | Muribaculum sp002492595 |
| Zotu5215 | 0.04 | 0.00 | Bacteroidota     | Bacteroidia    | Muribaculaceae  | Muribaculum | Muribaculum sp002492595 |
| Zotu2528 | 0.04 | 0.00 | Bacteroidota     | Bacteroidia    | Muribaculaceae  | Muribaculum | Muribaculum sp002492595 |
| Zotu5445 | 0.02 | 0.00 | Bacteroidota     | Bacteroidia    | Muribaculaceae  | Muribaculum | Muribaculum sp002492595 |
| Zotu5255 | 0.08 | 0.00 | Bacteroidota     | Bacteroidia    | Muribaculaceae  | Muribaculum | Muribaculum sp002492595 |
| Zotu5862 | 0.03 | 0.00 | Bacteroidota     | Bacteroidia    | Muribaculaceae  | Muribaculum | Muribaculum sp002492595 |
| Zotu4527 | 0.06 | 0.00 | Bacteroidota     | Bacteroidia    | Muribaculaceae  | Muribaculum | Muribaculum sp002492595 |
| Zotu6607 | 0.07 | 0.00 | Bacteroidota     | Bacteroidia    | Muribaculaceae  | Muribaculum | Muribaculum sp002492595 |
| Zotu3584 | 0.03 | 0.00 | Bacteroidota     | Bacteroidia    | Muribaculaceae  | Muribaculum | Muribaculum sp002492595 |
| Zotu6093 | 0.03 | 0.00 | Bacteroidota     | Bacteroidia    | Muribaculaceae  | Muribaculum | Muribaculum sp002492595 |
| Zotu6638 | 0.07 | 0.00 | Bacteroidota     | Bacteroidia    | Muribaculaceae  | Muribaculum | Muribaculum sp002492595 |

|          |      |      |                  |                  |                     |               |                           |
|----------|------|------|------------------|------------------|---------------------|---------------|---------------------------|
| Zotu4859 | 0.04 | 0.00 | Bacteroidota     | Bacteroidia      | Muribaculaceae      | Muribaculum   | Muribaculum sp002492595   |
| Zotu5152 | 0.03 | 0.00 | Bacteroidota     | Bacteroidia      | Muribaculaceae      | Muribaculum   | Muribaculum sp002492595   |
| Zotu6493 | 0.02 | 0.00 | Bacteroidota     | Bacteroidia      | Muribaculaceae      | Muribaculum   | Muribaculum sp002492595   |
| Zotu6097 | 0.03 | 0.00 | Bacteroidota     | Bacteroidia      | Muribaculaceae      | Muribaculum   | Muribaculum sp002492595   |
| Zotu5484 | 0.04 | 0.00 | Bacteroidota     | Bacteroidia      | Muribaculaceae      | Muribaculum   | Muribaculum sp002492595   |
| Zotu5534 | 0.02 | 0.00 | Bacteroidota     | Bacteroidia      | Muribaculaceae      | Muribaculum   | Muribaculum sp002492595   |
| Zotu6489 | 0.03 | 0.00 | Bacteroidota     | Bacteroidia      | Muribaculaceae      | Muribaculum   | Muribaculum sp002492595   |
| Zotu6460 | 0.02 | 0.00 | Bacteroidota     | Bacteroidia      | Muribaculaceae      | Muribaculum   | Muribaculum sp002492595   |
| Zotu5572 | 0.02 | 0.00 | Bacteroidota     | Bacteroidia      | Muribaculaceae      | Muribaculum   | Muribaculum sp002492595   |
| Zotu6595 | 0.04 | 0.00 | Bacteroidota     | Bacteroidia      | Muribaculaceae      | Muribaculum   | Muribaculum sp002492595   |
| Zotu5658 | 0.02 | 0.00 | Bacteroidota     | Bacteroidia      | Muribaculaceae      | Muribaculum   | Muribaculum sp002492595   |
| Zotu5634 | 0.02 | 0.00 | Bacteroidota     | Bacteroidia      | Muribaculaceae      | Muribaculum   | Muribaculum sp002492595   |
| Zotu5807 | 0.03 | 0.00 | Bacteroidota     | Bacteroidia      | Muribaculaceae      | Muribaculum   | Muribaculum sp002492595   |
| Zotu5716 | 0.02 | 0.00 | Bacteroidota     | Bacteroidia      | Muribaculaceae      | Muribaculum   | Muribaculum sp002492595   |
| Zotu5951 | 0.02 | 0.00 | Bacteroidota     | Bacteroidia      | Muribaculaceae      | Muribaculum   | Muribaculum sp002492595   |
| Zotu3894 | 0.04 | 0.00 | Bacteroidota     | Bacteroidia      | Muribaculaceae      | Muribaculum   | Muribaculum sp002492595   |
| Zotu5743 | 0.02 | 0.00 | Bacteroidota     | Bacteroidia      | Muribaculaceae      | Muribaculum   | Muribaculum sp002492595   |
| Zotu4941 | 0.07 | 0.00 | Bacteroidota     | Bacteroidia      | Muribaculaceae      | Muribaculum   | Vibrio parahaemolyticus   |
| Zotu5804 | 0.04 | 0.00 | Bacteroidota     | Bacteroidia      | Muribaculaceae      | UBA7173       | UBA7173 sp004102805       |
| Zotu4753 | 0.05 | 0.00 | Bacteroidota     | Bacteroidia      | Muribaculaceae      | UBA7173       | UBA7173 sp004102805       |
| Zotu6105 | 0.05 | 0.00 | Bacteroidota     | Bacteroidia      | Muribaculaceae      | Vibrio        | Vibrio parahaemolyticus   |
| Zotu6700 | 0.03 | 0.00 | Bacteroidota     | Bacteroidia      | Muribaculaceae      | Vibrio        | Vibrio parahaemolyticus   |
| Zotu4475 | 0.05 | 0.00 | Bacteroidota     | Bacteroidia      | Muribaculaceae      | Vibrio        | Vibrio parahaemolyticus   |
| Zotu5865 | 0.03 | 0.00 | Desulfobacterota | Desulfovibrionia | Desulfovibrionaceae | Desulfovibrio | Desulfovibrio sp003860215 |
| Zotu3742 | 0.06 | 0.00 | Desulfobacterota | Desulfovibrionia | Desulfovibrionaceae | Desulfovibrio | Desulfovibrio sp003860215 |
| Zotu5370 | 0.02 | 0.00 | Desulfobacterota | Desulfovibrionia | Desulfovibrionaceae | Desulfovibrio | Desulfovibrio sp003860215 |
| Zotu3774 | 0.02 | 0.00 | Desulfobacterota | Desulfovibrionia | Desulfovibrionaceae | Desulfovibrio | Desulfovibrio sp003860215 |
| Zotu3238 | 0.02 | 0.00 | Desulfobacterota | Desulfovibrionia | Desulfovibrionaceae | Desulfovibrio | Desulfovibrio sp900547595 |
| Zotu4155 | 0.05 | 0.00 | Desulfobacterota | Desulfovibrionia | Desulfovibrionaceae | Desulfovibrio | Desulfovibrio sp900547595 |
| Zotu5342 | 0.01 | 0.00 | Desulfobacterota | Desulfovibrionia | Desulfovibrionaceae | Desulfovibrio | Desulfovibrio sp900547595 |
| Zotu3812 | 0.04 | 0.00 | Desulfobacterota | Desulfovibrionia | Desulfovibrionaceae | Desulfovibrio | Desulfovibrio sp900547595 |
| Zotu4998 | 0.02 | 0.00 | Desulfobacterota | Desulfovibrionia | Desulfovibrionaceae | Desulfovibrio | Desulfovibrio sp900547595 |
| Zotu4009 | 0.03 | 0.00 | Desulfobacterota | Desulfovibrionia | Desulfovibrionaceae | Desulfovibrio | Desulfovibrio sp900547595 |
| Zotu6629 | 0.02 | 0.00 | Desulfobacterota | Desulfovibrionia | Desulfovibrionaceae | Desulfovibrio | Desulfovibrio sp900547595 |

|          |      |      |                  |                     |                     |               |                             |
|----------|------|------|------------------|---------------------|---------------------|---------------|-----------------------------|
| Zotu4327 | 0.02 | 0.00 | Desulfobacterota | Desulfovibrionia    | Desulfovibrionaceae | Desulfovibrio | Desulfovibrio sp900547595   |
| Zotu4782 | 0.03 | 0.00 | Desulfobacterota | Desulfovibrionia    | Desulfovibrionaceae | Desulfovibrio | Desulfovibrio sp900547595   |
| Zotu4439 | 0.05 | 0.00 | Desulfobacterota | Desulfovibrionia    | Desulfovibrionaceae | Desulfovibrio | Desulfovibrio sp900547595   |
| Zotu6265 | 0.02 | 0.00 | Desulfobacterota | Desulfovibrionia    | Desulfovibrionaceae | Desulfovibrio | Desulfovibrio sp900547595   |
| Zotu4964 | 0.01 | 0.00 | Desulfobacterota | Desulfovibrionia    | Desulfovibrionaceae | Desulfovibrio | Desulfovibrio sp900547595   |
| Zotu5179 | 0.00 | 0.03 | Firmicutes A     | Clostridia          | Clostridiaceae      | Clostridium   | Clostridium saudiense       |
| Zotu6695 | 0.00 | 0.21 | Firmicutes A     | Clostridia          | Lachnospiraceae     | Bacteroides F | Bacteroides_F pectinophilus |
| Zotu5489 | 0.00 | 0.46 | Firmicutes A     | Clostridia          | Lachnospiraceae     | Bacteroides F | Bacteroides_F pectinophilus |
| Zotu5932 | 0.00 | 0.14 | Firmicutes A     | Clostridia          | Lachnospiraceae     | Bacteroides F | Bacteroides_F pectinophilus |
| Zotu6424 | 0.00 | 0.23 | Firmicutes A     | Clostridia          | Lachnospiraceae     | Bacteroides F | Bacteroides_F pectinophilus |
| Zotu4341 | 0.00 | 0.29 | Firmicutes A     | Clostridia          | Lachnospiraceae     | Bacteroides F | Bacteroides_F pectinophilus |
| Zotu6321 | 0.80 | 0.00 | Firmicutes A     | Clostridia          | Lachnospiraceae     | Enterocloster | Acetatifactor sp900066565   |
| Zotu6659 | 0.01 | 0.00 | Firmicutes A     | Clostridia          | Lachnospiraceae     | Kineothrix    | Kineothrix alysoides        |
| Zotu1092 | 0.00 | 0.04 | Proteobacteria   | Gammaproteobacteria | Enterobacteriaceae  | Cronobacter   | Akkermansia muciniphila     |
| Zotu1361 | 0.00 | 0.02 | Proteobacteria   | Gammaproteobacteria | Enterobacteriaceae  | Cronobacter   | Akkermansia muciniphila     |
| Zotu682  | 0.00 | 0.03 | Proteobacteria   | Gammaproteobacteria | Enterobacteriaceae  | Cronobacter   | Akkermansia muciniphila     |
| Zotu627  | 0.00 | 0.03 | Proteobacteria   | Gammaproteobacteria | Enterobacteriaceae  | Cronobacter   | Cronobacter malonaticus     |
| Zotu832  | 0.00 | 0.02 | Proteobacteria   | Gammaproteobacteria | Enterobacteriaceae  | Cronobacter   | Cronobacter malonaticus     |
| Zotu861  | 0.00 | 0.01 | Proteobacteria   | Gammaproteobacteria | Enterobacteriaceae  | Cronobacter   | Cronobacter malonaticus     |
| Zotu773  | 0.00 | 0.01 | Proteobacteria   | Gammaproteobacteria | Enterobacteriaceae  | Cronobacter   | Cronobacter malonaticus     |
| Zotu1665 | 0.00 | 0.02 | Proteobacteria   | Gammaproteobacteria | Enterobacteriaceae  | Cronobacter   | Cronobacter malonaticus     |
| Zotu595  | 0.00 | 0.08 | Proteobacteria   | Gammaproteobacteria | Enterobacteriaceae  | Cronobacter   | Cronobacter malonaticus     |
| Zotu1458 | 0.00 | 0.01 | Proteobacteria   | Gammaproteobacteria | Enterobacteriaceae  | Cronobacter   | Cronobacter malonaticus     |
| Zotu445  | 0.00 | 0.09 | Proteobacteria   | Gammaproteobacteria | Enterobacteriaceae  | Cronobacter   | Cronobacter malonaticus     |
| Zotu352  | 0.00 | 0.06 | Proteobacteria   | Gammaproteobacteria | Enterobacteriaceae  | Cronobacter   | Cronobacter malonaticus     |
| Zotu1176 | 0.00 | 0.01 | Proteobacteria   | Gammaproteobacteria | Enterobacteriaceae  | Cronobacter   | Cronobacter malonaticus     |
| Zotu1279 | 0.00 | 0.04 | Proteobacteria   | Gammaproteobacteria | Enterobacteriaceae  | Cronobacter   | Cronobacter malonaticus     |
| Zotu827  | 0.00 | 0.02 | Proteobacteria   | Gammaproteobacteria | Enterobacteriaceae  | Cronobacter   | Cronobacter malonaticus     |
| Zotu610  | 0.00 | 0.03 | Proteobacteria   | Gammaproteobacteria | Enterobacteriaceae  | Cronobacter   | Cronobacter malonaticus     |
| Zotu818  | 0.00 | 0.02 | Proteobacteria   | Gammaproteobacteria | Enterobacteriaceae  | Cronobacter   | Cronobacter malonaticus     |
| Zotu931  | 0.00 | 0.02 | Proteobacteria   | Gammaproteobacteria | Enterobacteriaceae  | Cronobacter   | Cronobacter malonaticus     |
| Zotu1470 | 0.00 | 0.01 | Proteobacteria   | Gammaproteobacteria | Enterobacteriaceae  | Cronobacter   | Cronobacter malonaticus     |
| Zotu1322 | 0.00 | 0.01 | Proteobacteria   | Gammaproteobacteria | Enterobacteriaceae  | Cronobacter   | Cronobacter malonaticus     |
| Zotu1822 | 0.00 | 0.01 | Proteobacteria   | Gammaproteobacteria | Enterobacteriaceae  | Cronobacter   | Cronobacter malonaticus     |

|          |      |      |                   |                     |                    |             |                         |
|----------|------|------|-------------------|---------------------|--------------------|-------------|-------------------------|
| Zotu406  | 0.00 | 0.03 | Proteobacteria    | Gammaproteobacteria | Enterobacteriaceae | Cronobacter | Cronobacter malonaticus |
| Zotu855  | 0.00 | 0.03 | Proteobacteria    | Gammaproteobacteria | Enterobacteriaceae | Cronobacter | Cronobacter sakazakii   |
| Zotu1009 | 0.00 | 0.02 | Proteobacteria    | Gammaproteobacteria | Enterobacteriaceae | Cronobacter | Cronobacter sakazakii   |
| Zotu918  | 0.00 | 0.03 | Proteobacteria    | Gammaproteobacteria | Enterobacteriaceae | Cronobacter | Cronobacter sakazakii   |
| Zotu428  | 0.00 | 0.02 | Proteobacteria    | Gammaproteobacteria | Enterobacteriaceae | Cronobacter | Cronobacter sakazakii   |
| Zotu1658 | 0.00 | 0.03 | Proteobacteria    | Gammaproteobacteria | Enterobacteriaceae | Cronobacter | Cronobacter sakazakii   |
| Zotu765  | 0.00 | 0.02 | Proteobacteria    | Gammaproteobacteria | Enterobacteriaceae | Cronobacter | Cronobacter sakazakii   |
| Zotu888  | 0.00 | 0.01 | Proteobacteria    | Gammaproteobacteria | Enterobacteriaceae | Cronobacter | Cronobacter sakazakii   |
| Zotu1081 | 0.00 | 0.01 | Proteobacteria    | Gammaproteobacteria | Enterobacteriaceae | Cronobacter | Cronobacter sakazakii   |
| Zotu781  | 0.00 | 0.01 | Proteobacteria    | Gammaproteobacteria | Enterobacteriaceae | Cronobacter | Cronobacter sakazakii   |
| Zotu720  | 0.00 | 0.07 | Proteobacteria    | Gammaproteobacteria | Enterobacteriaceae | Cronobacter | Cronobacter sakazakii   |
| Zotu878  | 0.00 | 0.06 | Proteobacteria    | Gammaproteobacteria | Enterobacteriaceae | Cronobacter | Cronobacter sakazakii   |
| Zotu1000 | 0.00 | 0.01 | Proteobacteria    | Gammaproteobacteria | Enterobacteriaceae | Cronobacter | Cronobacter sakazakii   |
| Zotu1316 | 0.00 | 0.01 | Proteobacteria    | Gammaproteobacteria | Enterobacteriaceae | Cronobacter | Cronobacter sakazakii   |
| Zotu1523 | 0.00 | 0.01 | Proteobacteria    | Gammaproteobacteria | Enterobacteriaceae | Cronobacter | Cronobacter sakazakii   |
| Zotu706  | 0.00 | 0.03 | Proteobacteria    | Gammaproteobacteria | Enterobacteriaceae | Cronobacter | Cronobacter sakazakii   |
| Zotu1909 | 0.00 | 0.01 | Proteobacteria    | Gammaproteobacteria | Enterobacteriaceae | Cronobacter | Cronobacter sakazakii   |
| Zotu1152 | 0.00 | 0.02 | Proteobacteria    | Gammaproteobacteria | Enterobacteriaceae | Cronobacter | Cronobacter sakazakii   |
| Zotu1367 | 0.00 | 0.02 | Proteobacteria    | Gammaproteobacteria | Enterobacteriaceae | Cronobacter | Cronobacter sakazakii   |
| Zotu1720 | 0.00 | 0.01 | Proteobacteria    | Gammaproteobacteria | Enterobacteriaceae | Cronobacter | Cronobacter sakazakii   |
| Zotu381  | 0.00 | 0.05 | Proteobacteria    | Gammaproteobacteria | Enterobacteriaceae | Cronobacter | Cronobacter sakazakii   |
| Zotu736  | 0.00 | 0.04 | Proteobacteria    | Gammaproteobacteria | Enterobacteriaceae | Cronobacter | Cronobacter sakazakii   |
| Zotu1077 | 0.00 | 0.04 | Proteobacteria    | Gammaproteobacteria | Enterobacteriaceae | Cronobacter | Cronobacter sakazakii   |
| Zotu997  | 0.00 | 0.01 | Proteobacteria    | Gammaproteobacteria | Enterobacteriaceae | Cronobacter | Cronobacter sakazakii   |
| Zotu974  | 0.00 | 0.02 | Proteobacteria    | Gammaproteobacteria | Enterobacteriaceae | Cronobacter | Cronobacter sakazakii   |
| Zotu1038 | 0.00 | 0.02 | Proteobacteria    | Gammaproteobacteria | Enterobacteriaceae | Cronobacter | Cronobacter sakazakii   |
| Zotu1432 | 0.00 | 0.02 | Proteobacteria    | Gammaproteobacteria | Enterobacteriaceae | Cronobacter | Cronobacter sakazakii   |
| Zotu726  | 0.00 | 0.02 | Proteobacteria    | Gammaproteobacteria | Enterobacteriaceae | Cronobacter | Cronobacter sakazakii   |
| Zotu1293 | 0.00 | 0.01 | Proteobacteria    | Gammaproteobacteria | Enterobacteriaceae | Cronobacter | Cronobacter sakazakii   |
| Zotu1773 | 0.00 | 0.01 | Proteobacteria    | Gammaproteobacteria | Enterobacteriaceae | Cronobacter | Cronobacter sakazakii   |
| Zotu576  | 0.00 | 0.03 | Proteobacteria    | Gammaproteobacteria | Enterobacteriaceae | Cronobacter | Cronobacter sakazakii   |
| Zotu821  | 0.00 | 0.01 | Proteobacteria    | Gammaproteobacteria | Enterobacteriaceae | Cronobacter | Cronobacter sakazakii   |
| Zotu695  | 0.00 | 0.15 | Verrucomicrobiota | Verrucomicrobiae    | Akkermansiaceae    | Akkermansia | Akkermansia muciniphila |
| Zotu1477 | 0.00 | 0.02 | Verrucomicrobiota | Verrucomicrobiae    | Akkermansiaceae    | Akkermansia | Akkermansia muciniphila |



---

|          |      |      |                   |                  |                 |             |                         |
|----------|------|------|-------------------|------------------|-----------------|-------------|-------------------------|
| Zotu920  | 0.00 | 0.04 | Verrucomicrobiota | Verrucomicrobiae | Akkermansiaceae | Akkermansia | Akkermansia muciniphila |
| Zotu505  | 0.00 | 0.04 | Verrucomicrobiota | Verrucomicrobiae | Akkermansiaceae | Akkermansia | Akkermansia muciniphila |
| Zotu1011 | 0.00 | 0.05 | Verrucomicrobiota | Verrucomicrobiae | Akkermansiaceae | Akkermansia | Akkermansia muciniphila |
| Zotu721  | 0.00 | 0.05 | Verrucomicrobiota | Verrucomicrobiae | Akkermansiaceae | Akkermansia | Akkermansia muciniphila |
| Zotu724  | 0.00 | 0.04 | Verrucomicrobiota | Verrucomicrobiae | Akkermansiaceae | Akkermansia | Akkermansia muciniphila |
| Zotu801  | 0.00 | 0.02 | Verrucomicrobiota | Verrucomicrobiae | Akkermansiaceae | Akkermansia | Akkermansia muciniphila |
| Zotu1102 | 0.00 | 0.04 | Verrucomicrobiota | Verrucomicrobiae | Akkermansiaceae | Akkermansia | Akkermansia muciniphila |
| Zotu1115 | 0.00 | 0.02 | Verrucomicrobiota | Verrucomicrobiae | Akkermansiaceae | Akkermansia | Akkermansia muciniphila |
| Zotu1330 | 0.00 | 0.07 | Verrucomicrobiota | Verrucomicrobiae | Akkermansiaceae | Akkermansia | Akkermansia muciniphila |
| Zotu1416 | 0.00 | 0.01 | Verrucomicrobiota | Verrucomicrobiae | Akkermansiaceae | Akkermansia | Akkermansia muciniphila |
| Zotu1395 | 0.00 | 0.01 | Verrucomicrobiota | Verrucomicrobiae | Akkermansiaceae | Akkermansia | Akkermansia muciniphila |
| Zotu1133 | 0.00 | 0.02 | Verrucomicrobiota | Verrucomicrobiae | Akkermansiaceae | Akkermansia | Akkermansia muciniphila |
| Zotu1400 | 0.00 | 0.03 | Verrucomicrobiota | Verrucomicrobiae | Akkermansiaceae | Akkermansia | Akkermansia muciniphila |
| Zotu740  | 0.00 | 0.04 | Verrucomicrobiota | Verrucomicrobiae | Akkermansiaceae | Akkermansia | Akkermansia muciniphila |
| Zotu758  | 0.00 | 0.10 | Verrucomicrobiota | Verrucomicrobiae | Akkermansiaceae | Akkermansia | Akkermansia muciniphila |
| Zotu1389 | 0.00 | 0.02 | Verrucomicrobiota | Verrucomicrobiae | Akkermansiaceae | Akkermansia | Akkermansia muciniphila |
| Zotu1231 | 0.00 | 0.04 | Verrucomicrobiota | Verrucomicrobiae | Akkermansiaceae | Akkermansia | Akkermansia muciniphila |
| Zotu1346 | 0.00 | 0.01 | Verrucomicrobiota | Verrucomicrobiae | Akkermansiaceae | Akkermansia | Akkermansia muciniphila |
| Zotu757  | 0.00 | 0.04 | Verrucomicrobiota | Verrucomicrobiae | Akkermansiaceae | Akkermansia | Akkermansia muciniphila |
| Zotu2262 | 0.00 | 0.01 | Verrucomicrobiota | Verrucomicrobiae | Akkermansiaceae | Akkermansia | Akkermansia muciniphila |
| Zotu1160 | 0.00 | 0.01 | Verrucomicrobiota | Verrucomicrobiae | Akkermansiaceae | Akkermansia | Akkermansia muciniphila |

---
